# Supplementary material for: A dietary anthocyanin cyanidin-3-O-glucoside binds to PPARs to regulate glucose metabolism and insulin sensitivity in mice
Source: Springer Nature journal article supplement (doi:10.1038/s42003-020-01231-6), 2020-09-18
Supplement: 42003_2020_1231_MOESM2_ESM.pdf [file 42003_2020_1231_MOESM2_ESM.pdf]

## **Description of Additional Supplementary Files**

File Name: Supplementary Data 1

Description: Source data for Figures 1 to 5 and Table 1
